# Supplementary material for: Yap regulates skeletal muscle fatty acid oxidation and adiposity in metabolic disease
Source: PubMed Central journal article supplement (PMC8129430; doi:10.1038/s41467-021-23240-7), 2021-05-17
Supplement: 41467_2021_23240_MOESM3_ESM.pdf [file 41467_2021_23240_MOESM3_ESM.pdf]

## Description of Additional Supplementary Files

**File Name:** Supplementary Data 1

**Description:** Metabolomics and Lipidomics datasets from data shown in Fig 2.

**File Name:** Supplementary Data 2

**Description:** ATAC-sequencing dataset from data shown in Fig 3.

**File Name:** Supplementary Data 3

**Description:** RNA-sequencing dataset from data shown in Fig 3.

**File Name:** Supplementary Data 4

**Description:** GSEA analysis of RNA-sequencing dataset shown in Fig 3.

**File Name:** Supplementary Data 5

**Description:** Proteomics dataset from data shown in Fig 3.

**File Name:** Supplementary Data 6

**Description:** GSEA analysis of Proteomics data shown in Fig 3.

**File Name:** Supplementary Data 7

**Description:** Primer and Probe IDs for Taqman assays or Primer sequences for Syber Green assays used in this study.
